# Supplementary material
Source: publisher site journal article supplement (https://www.dovepress.com/article/358737)
Supplement: Supplementary file 1 [file get_supplementary_file.php]

Searching method for PubMed (on 31 August 2022)

| **Search number** | **Query** |
| --- | --- |
| 1 | ("Child"[Mesh] OR "Pediatrics"[Mesh]) OR (Child*[Title/Abstract] OR Pediatric*[Title/Abstract]) |
| 2 | (obstructive sleep apnea[MeSH Terms] OR sleep apnea syndrome[MeSH Terms]) OR (obstructive sleep apnea[Title/Abstract] OR sleep apnea syndrome[Title/Abstract] OR OSA[Title/Abstract]) |
| 3 | #1 AND #2 |
| 4 | (CPAP[Title/Abstract] OR BPAP[Title/Abstract] OR BiPAP[Title/Abstract]) OR (device*[Title/Abstract] OR machine[Title/Abstract]) |
| 5 | #3 AND #4 |
| 6 | "Observational Study" [Publication Type] OR "Observational Studies as Topic"[Mesh] |
| 7 | #5 AND #6 |

Searching method for Central (on 31 August 2022)

| **Search number** | **Query** |
| --- | --- |
| 1 | MeSH descriptor: [Child] explode all trees |
| 2 | (Child*):ti,ab,kw OR (Pediatric*):ti,ab,kw |
| 3 | MeSH descriptor: [Sleep Apnea Syndromes] explode all trees |
| 4 | (CPAP):ti,ab,kw OR (BPAP):ti,ab,kw OR (BiPAP):ti,ab,kw OR (device*):ti,ab,kw OR (machine):ti,ab,kw |
| 5 | (#1 AND #2 AND #3) AND #4 |

Searching method for Scopus (on 31 August 2022)

( ( TITLE-ABS-KEY ( child* ) OR TITLE-ABS-KEY ( pediatric* ) ) ) AND ( ( TITLE-ABS-KEY ( obstructive AND sleep AND apnea ) OR TITLE-ABS-KEY ( sleep AND apnea AND syndrome ) OR TITLE-ABS-KEY ( osa ) ) ) AND ( ( TITLE-ABS-KEY ( cpap ) OR TITLE-ABS-KEY ( bpap ) OR TITLE-ABS-KEY ( bipap ) OR TITLE-ABS-KEY ( device* ) OR TITLE-ABS-KEY ( machine ) ) ) AND ( ( TITLE-ABS-KEY ( observational AND study ) OR TITLE-ABS-KEY ( case-control ) OR TITLE-ABS-KEY ( cross-sectional ) OR TITLE-ABS-KEY ( cohort ) OR TITLE-ABS-KEY ( prospective ) OR TITLE-ABS-KEY ( retrospective ) ) ) AND ( LIMIT-TO ( DOCTYPE , "ar" ) ) AND ( LIMIT-TO ( EXACTKEYWORD , "Child" ) ) AND ( LIMIT-TO ( SRCTYPE , "j" ) )

Searching method for CINAHL (on 31 August 2022)

| **Search number** | **Query** |
| --- | --- |
| S1 | TI child* OR AB child* OR TI pediatric* OR AB pediatric*  Expanders - Apply equivalent subjects  Search modes - Find all my search terms |
| S2 | TI ( obstructive sleep apnea or osa ) OR AB ( obstructive sleep apnea or osa )  Expanders - Apply equivalent subjects  Search modes - Find all my search terms |
| S3 | TI ( continuous positive airway pressure or cpap or pap or bipap ) OR AB ( continuous positive airway pressure or cpap or pap or bipap ) OR TI ( device* or machine ) OR AB ( device* or machine )  Expanders - Apply equivalent subjects  Search modes - Find all my search terms |
| S4 | TI ( observational study or observational research ) OR AB ( observational study or observational research ) OR TI ( case control study or case-control study ) OR AB ( case control study or case-control study ) OR TI ( cross sectional study or cross-sectional study ) OR AB ( cross sectional study or cross-sectional study ) OR TI ( cohort study or prospective study ) OR AB ( cohort study or prospective study ) OR TI retrospective study OR AB retrospective study  Expanders - Apply equivalent subjects  Search modes - Find all my search terms |
| S5 | (S1 AND S2 AND S3 AND S4)  Expanders - Apply equivalent subjects  Search modes - Find all my search terms |
